1

## 2 Quasi-periodic migration of single cells on short microlanes

3

4 Fang Zhou<sup>1</sup>, Sophia A. Schaffer<sup>1</sup>, Christoph Schreiber<sup>1</sup>, Felix J. Segerer<sup>1</sup>, Andriy Goychuk<sup>2</sup>,  
5 Erwin Frey<sup>2</sup> and Joachim O. Rädler<sup>1\*</sup>

6

7 <sup>1</sup> Faculty of Physics and Center for NanoScience, Ludwig-Maximilians-Universität München,  
8 Munich, Germany

9 <sup>2</sup> Arnold-Sommerfeld-Center for Theoretical Physics, Faculty of Physics and Center for  
10 NanoScience, Ludwig-Maximilians-Universität München, Munich, Germany

11

12 \* Correspondence: Joachim O. Rädler

13 E-mail: raedler@lmu.de

14

### 15 **Abstract**

16 Cell migration on microlanes represents a suitable and simple platform for the exploration of  
17 the molecular mechanisms underlying cell cytoskeleton dynamics. Here, we report on the  
18 quasi-periodic movement of cells confined in stripe-shaped microlanes. We observe persistent  
19 polarized cell shapes and directed pole-to-pole motion within the microlanes. Cells depolarize  
20 at one end of a given microlane, followed by delayed repolarization towards the opposite end.  
21 We analyze cell motility via the spatial velocity distribution and frequency spectrum. The  
22 experimental data are compared to a Cellular Potts model that includes a minimal description  
23 of cytoskeleton dynamics. In particular, we evaluate the reversal time as a measure for  
24 spontaneous repolarization of cells as well as the time required to quench the leading  
25 lamellipodium at the microlane ends. Using LifeAct-GFP transfected cells and microlanes  
26 with differently shaped ends, we find distinct scenarios at the leading edge. Here, we show  
27 that the tip geometry and hence the local deformation of the leading edge of the cell has an  
28 effect on actin polymerization. Our experiments and computer simulations show that quasi-  
29 oscillatory cell motion on short lanes enables addressing how boundaries affect cytoskeleton  
30 advancement and repolarization dynamics in a repeated and quantitative manner.

31 **Keywords: Cell migration, quasi-periodic, polarization, actin dynamic, micropattern**

## 32 **Introduction**

33 Cells navigate in complex environments and undergo morphological changes via dynamic  
34 reorganization of the actin cytoskeleton [1, 2]. Movement is generated by cyclic phases of  
35 protrusion, adhesion to the extracellular environment, and actomyosin-driven retraction of the  
36 cell rear. Actin polymerization and crosslinking prevails in the advancement of filaments,  
37 protrusions and lamellipodia. Unraveling the mechanisms underlying actin transport,  
38 polymerization dynamics, and their regulation by Rho family GTPases are central challenges  
39 towards an intricate understanding of cell migration. The dynamics of actin indeed show  
40 many peculiarities, including traveling wave patterns [3-6], retrograde actin flow at the  
41 leading edge [2, 7-9], protrusion-retraction cycles as well as persistent polarity [5, 10]. In 2D  
42 cell culture, the actomyosin-driven shape changes of the cell body lead to phenotypic  
43 migratory modes that can be detected across large length scales. The macroscopically  
44 apparent persistent random walk is generated by the following key components: (i)  
45 persistence of leading protrusions and (ii) spontaneous front-rear polarization of cells.  
46 According to theory, cell polarization might emerge from a bi-stable reaction-diffusion  
47 system that is formed by intracellular signaling proteins [11]. Detailed spatiotemporal models  
48 of the signaling biochemistry of Rho family GTPases, which interact with the cell membrane  
49 and actin-binding proteins, were found to reproduce front-rear polarization and cell shape [12-  
50 15]. Apart from polarization, such bi-stable mass-conserving reaction-diffusion equations in  
51 general can also exhibit oscillations [16]. Here, related observations are the occurrence of  
52 actin waves or oscillatory cell shape dynamics. For example, in *Dictyostelium discoideum*,  
53 PIP signal polarization, as well as PI3K and PTEN regulation shows spontaneous waves and  
54 oscillations relevant for chemotaxis [17, 18]. However, even though these oscillations share  
55 general features, spontaneous large-scale oscillations in the eukaryotic cytoskeleton remain a  
56 rare phenomenon.

57 In recent years, artificial micropatterns have been used to confine cell migration to well-  
58 defined geometries [19], in particular microlanes [20-23]. On microlanes, cell motion is  
59 reduced to an effective 1D persistent random walk. There, a universal relation between  
60 persistence and cell velocity was shown to hold [7]. Other micropatterns with non-trivial  
61 geometries give rise to novel migratory behavior: circular adhesion islands lead to rotational  
62 migration of small cohorts of cells [24], ratchet geometries induce directed migration [25-27],  
63 cells confined in dumbbell-shaped micropatterns undergo repeated stochastic transitions  
64 characterized by intricate nonlinear migratory dynamics [28], and microlanes with gaps show

65 emergence of stochastic cell reversal and transits [29]. In addition, migration patterns may  
66 change upon interference with the cytoskeleton. For example, persistent cell migration on  
67 linear microlanes shifts to striking oscillations upon depolymerization of microtubules [30] or  
68 by depletion of zyxin, a protein that concentrates at focal adhesions and actin cytoskeleton  
69 components [31]. Because of their flexibility in controlling cell behavior, micropatterns are  
70 well suited to verify computational models of cytoskeleton dynamics and to advance our  
71 understanding of the underlying regulatory network. In particular, computer simulations have  
72 predicted periodic migration of cells on 1D micropatterns [32]. Similar findings were reported  
73 in reaction-diffusion models of actin waves on flexible and on circular boundaries [3, 33].  
74 These theoretical studies suggest that confining geometries might reinforce sustained  
75 oscillations. However, systematic experimental studies of periodic cell migration on  
76 micropatterns have not yet been carried out. In particular, there have been no studies  
77 regarding the dynamics and curvature-dependence of repolarization in the presence of a  
78 boundary.

79 Here, we study the migration of single cells on short microlanes. Using micro contact printing,  
80 we create arrays of fibronectin-coated stripe-shaped micropatterns of different lengths. On  
81 these micropatterns, we observe quasi-periodic cell migration for the breast cancer cell line  
82 MDA-MB-231. We investigate how the spatial distribution of the cell position, the velocity  
83 distribution, and the periodicity of cell migration depend on the microlane length. Our data  
84 indicate that cells undergo repeated cycles of directed migration with pronounced cell  
85 polarization, followed by distinct termination of the cell's leading edge at the micropattern  
86 ends, and spontaneous cell repolarization in the opposite direction. We recapitulate these  
87 migratory features in a dynamic Cellular Potts model, which includes a simplified description  
88 of the adapting cell cytoskeleton [34]. Subsequently, we compare the distributions of apparent  
89 repolarization times between our experiments and computer simulations. Finally, we discuss  
90 how micropatterns constitute a controlled experimental framework that enables further  
91 investigation into the existence of excitable dynamics in actin-based cell migration.

## 92 **Results and discussions**

### 93 **1. Single cell migration on stripe-shaped microlanes**

94 In a first set of experiments, we investigated whether cells captured on microlanes exhibit  
95 oscillatory migration. Breast cancer cells (MDA-MB-231) are seeded on arrays of fibronectin-  
96 coated microlanes, which are surrounded by a PEGylated and therefore cell-repellent surface.  
97 These microlanes feature six different lengths between 70 and 270  $\mu\text{m}$ . The fabrication of the

98 micropattern follows previous protocols and is described in detail in the methods section.  
99 Cells adhere, spread and remain confined within the microstructures during the entire period  
100 of the experiment. Movies were taken in time-lapse mode, recording images every 10 min  
101 over a period of 36 h. During this time, cells migrate in a guided manner and always align  
102 their front-rear polarity axis along the main axis of the microlanes. We observe repeated  
103 cycles of directed motion, termination of the motion at the micropattern ends, and cell  
104 repolarization in the opposite direction. This recurring sequence of events leads to quasi-  
105 periodic migration as shown in the time sequences in Fig 1a. Cells exhibit a typical migratory  
106 morphology with an actin-rich lamellipodium at the leading edge – seen as a dark rim in  
107 phase contrast – and a retracting tail at the rear. As cells reach the respective end of a  
108 microlane, they adopt a shortened, almost round appearance with no lamellipodium, until a  
109 newly formed lamellipodium appears at the opposite end of the cell body. These migratory  
110 and resting phenotypes coincide with distinct regimes of cell motion, which we obtain by  
111 tracking the cell nucleus. Fig 1b shows an exemplary trajectory of a cell nucleus over the  
112 course of 36 hours. The cell shows phases of directed motion followed by pausing and  
113 repolarization, thereby resulting in a quasi-periodic movement. Note that cell motion is quasi-  
114 periodic in the sense that the time needed for reorientation of the cell is stochastic, which  
115 leads to variability in the period of the back-and-forth motion.

116 **Fig 1. Cell migration on microlanes:** (a) Time sequence of a cell (MDA-MB-231) migrating on a stripe-shaped  
117 micropattern (Stripe length  $L = 120 \mu\text{m}$ , width  $W = 20 \mu\text{m}$ , 10 min time intervals). Images are taken in phase  
118 contrast and with fluorescence microscopy. The nucleus is labeled with Hoechst 3334 as indicated in blue. (b)  
119 Trajectory of cell nucleus tracked over the course of 36 h showing quasi-periodic alternations between directed  
120 migration and repolarization.

121

## 122 2. Spatial velocity distribution

123 In order to better distinguish phases of directed migration from phases of reorientation, we  
124 fabricated microlanes of different lengths. A sufficiently large sample size of hundreds of  
125 cells was acquired by parallel automated tracking of fluorescently labeled cell nuclei. Our  
126 automated image analysis yields cell trajectories  $x(t)$  as described in the Materials and  
127 Methods. The instantaneous cell velocities are determined by  $v(t) = [x(t + \Delta t) - x(t)]/\Delta t$ ,  
128 where  $\Delta t = 10 \text{ min}$  is the time interval between two subsequent frames. Fig 2 shows  
129 exemplary single cell trajectories together with the spatial distributions of cell positions and  
130 velocities, which were sampled from ensembles of about 100 cells for each microlane length.  
131 These distributions are determined by binning the cell positions into  $5 \mu\text{m}$  sections along the  
132 microlane, and then computing the fraction  $p(x)$  and the mean absolute velocity  $\langle |v| \rangle(x)$  of

133 cells found in each bin. Cells on the shortest microlane ( $L = 70 \mu\text{m}$ ) do not exhibit periodic  
134 motion, and instead remain in a symmetric morphology with two lamellipodia extending at  
135 the cell tips. Evidently, there is not enough space for directional migration on short  
136 microlanes. In contrast, quasi-periodic migration is observed on longer microlanes ( $L = 120 -$   
137  $270\mu\text{m}$ ). Fig 2b shows that the detection frequency of cell nuclei decreases towards the  
138 micropattern tips and becomes flat in the middle of the microlanes. Similarly, the mean  
139 absolute velocity distributions decline towards the micropattern tips and show a distinct  
140 plateau behavior at the case of longer microlanes ( $220 \mu\text{m}$  and  $270 \mu\text{m}$ ), with mean absolute  
141 velocities ranging from  $0.3 - 0.6 \mu\text{m}/\text{min}$  (Fig 2c).

142 **Fig 2. Migration pattern as a function of lane length:** From left to right: (a) Time courses of cell nucleus  
143 position of cells within microlanes. (b) Spatial distributions of nuclei. (c) Spatial distributions of mean absolute  
144 cell velocity. Blue lines are SE for the binned data. (d) Schematic drawing of the microlanes with length  $L = 70,$   
145  $120, 170, 220, 270 \mu\text{m}$  and width  $W = 20 \mu\text{m}$ . Dashed lines indicate the transition between microlane tips and  
146 microlane center. These results were obtained by binning the cell positions ( $5\mu\text{m}$  bin width). For each micro-  
147 pattern stripe length, we tracked roughly 100 cells.

148 Cell speeds are uniformly distributed in the center of the microlanes and decline at the tips,  
149 where cell repolarization occurs. In order to differentiate these two microlane regions, we  
150 look more closely at the mean absolute velocity distribution. The spatial velocity distributions  
151 appear to have a trapezoidal profile, where two velocity ramps at the microlane tips are  
152 connected by a plateau in the microlane center. Then, we determine the transition points  
153 between the ramp (repolarization) and plateau (run) regions (see black dashed lines in Fig 2).  
154 In order to identify these transition points, we apply a change-point-analysis as described in  
155 the Supporting Information S2. We find that the distance from the transition points to the tip  
156 of the microlane  $\xi_0 = 55 \mu\text{m}$  is nearly constant across all micropattern lengths. Thus, cells on  
157  $120 \mu\text{m}$  stripes are able to polarize but have only a very short migration phase until interacting  
158 with the opposite boundary. In the center of longer microlanes ( $L = 170, 220,$  and  $270 \mu\text{m}$ ), we  
159 find longer phases of directed motion in which cells migrate with a mean absolute velocity of  
160 approximately  $0.4 - 0.6 \mu\text{m}/\text{min}$ .

161

### 162 **3. Velocity distribution and sustained oscillations**

163 We further quantify the quasi-periodic migration of cells. First, we determine the overall  
164 distribution of absolute cell velocities (Fig 3a). We find that for microlanes long enough to  
165 show persistent cell migration ( $L = 120 - 270 \mu\text{m}$ ), the cell velocity distributions collapse onto an  
166 exponentially decaying master curve. Short microlanes, where we do not observe persistent  
167 cell migration, show a distinctly narrower velocity distribution. This is likely explained by the

168 observation that cell repolarization begins at a distance of  $55\mu\text{m}$  from the micropattern tips. If  
169 the microlane is shorter than this distance, then the cell is in a constant state of repolarization,  
170 which diminishes oscillatory motion.

171 **Fig 3. Overall spectral analysis of the large ensemble of cell traces.** (a) Normalized distribution of absolute  
172 cell velocities,  $\langle |v| \rangle$ , for single MDA-MB-231 cells migrating in stripe-shaped micro patterns of five different  
173 lengths and fixed width ( $W=20\ \mu\text{m}$ ). Inset: Non-normalized (counts) velocity distribution in a logarithmic plot.  
174 (b) Discrete Fourier transform of the time-dependent directional velocities, fitted by a log-normal distribution  
175 (lines). (c) The migration period ( $T=1/\text{frequency}$ ) of single cells increases linearly with the stripe length. The  
176 error bars correspond to the peak width of the fitting in (b).  
177 Subsequently, we performed a discrete Fourier transform of the cell velocity time-traces for  
178 different stripe lengths, which yields the frequency distribution corresponding to the quasi-  
179 periodic cell migration. We find that the frequency spectrum follows a log-normal distribution.  
180 Furthermore, the dominant frequency ( $f_{max}$ , peak of the frequency spectrum) shifts to lower  
181 frequencies for longer stripe lengths. This indicates that cells move with a constant velocity  
182 across the micro-lane. To demonstrate this hypothesis, we plot the period of migration,  
183  $T = 1/f_{max}$ , against the stripe length (Fig 3c). We find that the period of migration increases  
184 linearly with the stripe length, at a slope  $dT/dL = 0.054 \pm 0.006\ \text{h}/\mu\text{m}$ . This corresponds to  
185 a constant average velocity of pole-to-pole migration,  $v_c = 0.62\ \mu\text{m}/\text{min}$ , which is in good  
186 agreement with the velocity plateau in the stripe centers (Fig 2).

#### 187 **4. Repolarization time**

188 In the following, we address cell repolarization and the dynamics of directed migration  
189 reversal at the ends of the microlanes. We observe that cells depolarize when the protruding  
190 lamellipodium encounters the confining PEG-layer. The cell then compacts as its trailing edge  
191 continues to move. As the trailing edge stalls, the cell begins to expand again and finally  
192 repolarizes towards the opposite, free cell edge. This repolarization manifests itself in a new  
193 lamellipodium that emerges at the free cell edge. Note that this phenomenon of internal  
194 repolarization is rather specific for cells confined on tracks. The more general appearance of  
195 mesenchymal cell migration in 2D as well as 3D appears to redirect existing lamellipodia or  
196 exhibit several competing lamellipodia. However, in the experiments presented here, the  
197 appearance of lamellipodia is restricted to two sides of the cell due to its lateral confinement  
198 by the microlanes. Hence, reorientation of crawling cells occurs via a relatively well-defined  
199 cycle of depolarization and repolarization. This feature allows us to examine the “reversal  
200 time”, which is a measure for the time scale of depolarization and repolarization when a cell  
201 reaches the end of a microlane. To this end, we define a reversal area  $A_0$  at the ends of the

202 stripes (Fig 4a) that marks the regions where the velocities are observed to decrease in Figure  
203 2 (with a distance  $\xi_0 = 55 \mu\text{m}$  to the boundary). During a depolarization-repolarization cycle, a  
204 cell first enters the reversal area at  $t = t_1$  when it approaches the microlane tip, and leaves it  
205 at  $t = t_2$  after repolarization. Therefore, we define the reversal time as  $t_R = t_2 - t_1$  and  
206 determine its distribution for four different micro-lane lengths (Fig 4b). We note that the  
207 distributions are independent of the stripe length. Although the exact value of the average  
208 reversal time will typically depend on the particular choice of the reversal area, we  
209 consistently find an average depolarization and repolarization time of approximately 100 min.

210 **Fig 4. Distribution of “reversal times”:** (a) Schematic drawing of a cell entering the microlane tip region  $A_0$ ,  
211 arresting and then returning from the tip region, with the leading edge of the cell shaded in dark green. The red  
212 dashed line indicates the position of cell entry into the tip region  $A_0$ , at time  $t_1$ , and exit of the tip region, at time  
213  $t_2$ . (b) The normalized distribution of the reversal times  $t_R = t_2 - t_1$  for four different microlane lengths. Inset:  
214 Non-normalized (counts) distribution of the reversal times.

215

## 216 5. Cellular Potts model recapitulates quasi-periodic motion

217 The data presented so far are obtained from a large cell ensemble. Therefore, the distribution  
218 functions that describe the quasi-oscillatory cell motion present a robust and generic testbed  
219 for comparison with mathematical modeling. Recently, we have developed an extended  
220 Cellular Potts model that is capable of describing spatiotemporal dynamics of cells in 2D [24,  
221 34]. In particular, we model the spatiotemporal dynamics of the contact area of a cell with a  
222 planar substrate, which is described by a set of discrete adhesion sites on a 2D lattice. In  
223 addition to a simplified description of the mechanical properties of cells [35-37], we also  
224 account for a minimal mechanism of cell polarization. Specifically, we include an internal  
225 self-regulating *polarization field* within each individual cell, which emulates effective  
226 protrusive forces due to actin polymerization, as well as actomyosin contractility and cell-  
227 substrate adhesions. This polarization field is regulated via intracellular signals that are  
228 assumed to have a fixed range. In more detail, we simplify all intracellular signaling, which is  
229 mediated e.g. by the Rho GTPase family of proteins, into two prototypical feedback loops: (i)  
230 cell protrusions reinforce the protrusion field and lead to further protrusions and (ii) cell  
231 retractions weaken the protrusion field and lead to further retractions [24, 34].

232 We then simulated individual cells with fixed parameters and constant average area on stripe-  
233 shaped microlanes. Note that this premise already marks a striking difference from the  
234 experiments: in the simulations we investigate a population of clonal and therefore identical  
235 cells, while the cells used in the experiments show a wide variation in morphology and



236 migratory behavior. Therefore, we expect the simulations to underestimate all variances  
237 compared to the experiments. Furthermore, we adjusted the duration of a Monte Carlo step so  
238 that the average absolute velocity of migrating simulated cells,  $\langle |v| \rangle = 0.6 \mu\text{m}/\text{min}$ , matches  
239 the experiments. Based on our previous work[34, 38], we modified the parameters to account  
240 for cell persistence and stochasticity, and to achieve a sufficiently fine discretization of the  
241 cell body to resolve the micropattern tips. A detailed description of the parameters is provided  
242 in the Supporting Information S1.

243 With the simulated cell trajectories being in good agreement with experimental data (Fig 5),  
244 we find that the model reproduces the quasi-oscillatory motion observed in our experiments.  
245 We then evaluated the distribution of cell reversal times in the simulations analogously to the  
246 experiments, observing a pronounced peak at 100 min (Fig 5c). Furthermore, the simulated  
247 cells show a similar spatial velocity distribution as in the experiments (Fig 5d). In addition,  
248 we also performed more intuitive comparisons between simulations and experiments. In  
249 particular, we find similar morphologies of (i) polarized and persistently migrating cells with  
250 a flat leading edge and a tapered rear, (ii) cells that depolarize after running into a dead end on  
251 the microlane, and (iii) repolarized cells (Fig 5a). In addition, to assess actin distribution  
252 during cell migration, we transfected live cells with a fusion construct of the actin-binding  
253 peptide LifeAct and GFP (LifeAct-GFP). Intuitively comparing the representative  
254 kymographs for both a simulated cell and an experimental LifeAct-GFP transfected cell, both  
255 demonstrate similar oscillations on the same microlane (Fig 5b). Our findings suggest that the  
256 quasi-periodic migration of cells on microlanes is well described by an extended Cellular  
257 Potts model. This model predicts emergent cell polarization from stochastic occurrence and  
258 self-reinforcement of cell protrusions, which then leads to a stochastic (re)polarization time.  
259 However, we also note a qualitative difference between experiments and simulations. It seems  
260 likely that there is a sharper actin accumulation at the leading edge in experiments, in contrast  
261 to the polarization field (which can be seen as a proxy for the cytoskeleton density) of a  
262 simulated cell decreasing progressively from front to rear.

263 **Fig 5. Comparison of computer simulation and experimental results.** The microlane length is fixed at 150  
264  $\mu\text{m}$  with a round tip geometry. (a) The extended Cellular Potts model features an internal polarization field. the  
265 simulation reproduces the distinct run and rest phenotypes and yields cell center-of-mass trajectories that show  
266 quasi-periodic behavior (bottom); experimentally obtained cell trajectories are indicate on the upper right. (b)  
267 Comparison between the kymograph of a LifeAct-GFP transfected MDA-MB-231 cell with nuclear staining  
268 (bottom) and the kymograph of a simulated cell. Top: Zoom-in into a region that contains two periods of  
269 oscillation. Top left: Simulated cell. Top right: Experimental cell. Bottom: Zoom-out to the kymograph of an



270 experimental cell that performs many periods of oscillation. Red arrows indicate actin dynamics in the front of  
271 the cells. (c) Reversal time distributions of simulated and experimental cells. (d) Spatial mean absolute velocity  
272 distributions of simulated and experimental cells.  
273

## 274 **6. Effect of curvature on cell depolarization**

275 It is understood that the non-linear dynamics of actin polymerization and turnover depends on  
276 the cell shape and the geometry in which the cell migrates [14, 39]. In order to test the  
277 interplay between surface geometry and cell contour, we investigate the depolarization and  
278 repolarization of cells on microlanes with differently shaped tips. For example, a tapered tip  
279 allows us to explore how the reversal time depends on the deformation of the leading  
280 lamellipodium. To this end, we fabricated microlanes with four distinctly curved tips: round-,  
281 blunt-, sharp-, and concave-shaped, while keeping the total area and the width of the stripes  
282 constant (Fig 6a) to assure the comparability of the cell behavior. In order to observe many  
283 reversal events but also directed migration we established a length of 170  $\mu\text{m}$  for the round  
284 tips. Thus, depending on the tip geometry the length of the stripes is slightly different to  
285 achieve a constant area. Exemplary fluorescent images of the adhesion micro-patterns are  
286 shown in Fig 6b. Across all studied geometries, we find that cells consistently exhibit  
287 oscillatory motion. Furthermore, the distribution of reversal times, or in other words, the  
288 depolarization-repolarization time, does not depend significantly on the respective tip  
289 geometry (Fig 6c). All reversal times are centered around approximately 100 min, which is  
290 consistent with the results in Fig. 4b. Evidently, tip curvature does not play a significant role  
291 in determining the reversal time for a defined tip area. A comparison between experiments  
292 and simulations, using the same algorithms for the analysis, yields similar reversal times (Fig  
293 6d). However, the reversal time distribution is typically broader in the experiments than in the  
294 simulations, indicating that our simulations might underestimate the cell variability. Note, that  
295 it is equally likely that the broad distribution of reversal times in the experiments originates  
296 from cell-to-cell variability in the ensemble, e.g. cell size, which is not considered by the  
297 simulations at all.

298 **Fig 6. Effect of curvature on the repolarization time.** (a) Schematic diagram of micropattern geometry  
299 with four different tip shapes: blunt, concave, round, and sharp. The area of all stripes and the reversal  
300 area  $A_0$  are kept constant same. (b) Exemplary fluorescent images of microlanes of width  $W=20 \mu\text{m}$ . (c, d)  
301 The distribution of cell reversal times ( $\Delta t$ ) when reaching the microlane tips, for four different tip shapes.  
302 The cell enters the reversal area  $A_0$  from the corresponding microlane tip. (c) Experimental reversal time  
303 distribution. (d) Simulated reversal time distribution.

304

305 To gain additional insight into the spatiotemporal actin dynamics at the leading edge of the  
306 cell, we recorded a series of live time-lapse images of LifeAct-GFP transfected MDA-MB-  
307 231 cells. LifeAct, which is an actin-binding peptide-GFP fusion construct, does not interfere  
308 with actin dynamics [40]. The deformation of the leading edge and the spatial distribution of  
309 F-actin in the protrusions are visualized in a close-up image series of the advancing  
310 lamellipodium at the microlane ends (Fig 7). There, we also show snapshots of the leading  
311 edge of simulated cells for a direct comparison between experiment and simulation. Both in  
312 experiments and simulations, we find that the lamellipodium splits in the concave-shaped end  
313 and is focused in a sharp tip. These findings indicate that the local actin assembly is  
314 determined by the local curvature of the confining PEG-border. Furthermore, our experiments  
315 show that the cell contour is not entirely adjusted to the contour of the fibronectin/PEG  
316 interface. In many instances, we find transient actin protrusions into the PEGylated area.  
317 Because the PEGylated area does not constitute a solid mechanical boundary in our  
318 experiments, actin protrusions may invade into this region. However, the cell is not capable of  
319 adhering to the underlying substrate, leading to a subsequent retraction. In contrast, in our  
320 computer simulations we strictly confine the cell contour to the micropattern. Furthermore, in  
321 the simulation, the contour of the advancing cell edge does not adopt the shape of the concave  
322 and sharp microlane tips to the same degree as in the experiments (Fig 7c and d). This might  
323 be due to (i) an overestimation of the perimeter stiffness or (ii) prohibiting the simulated cell  
324 from leaving the micropattern, which would allow less curved cell shapes.

325 **Figure 7: Geometry dependence of migratory arrest:** Comparison between LifeAct GFP labeled MDA-  
326 MB-231 cells and simulated cells, which migrate towards differently shaped micro-lane tips (Lane length  
327  $L=170\ \mu\text{m}$ , width  $W=20\ \mu\text{m}$ ). The top row (in green) shows fluorescence time-lapse data, while the bottom  
328 row shows the corresponding computer simulation for a) round-shaped tips b) blunt-shaped tips c)  
329 sharp-shaped tips and d) concave-shaped tips.

## 330 Conclusion

331 In this work, we investigate single cells that migrate within a confinement in the form of short  
332 microlanes. The dominant oscillation frequency, the spatial distribution of cell positions and  
333 the persistent velocity of polarized migrating cells as a function of microlane length confirm a  
334 pole-to-pole migration mode. We find that cells migrate in a stochastic, quasi oscillatory  
335 manner with repetitive depolarization-repolarization processes. A morphological view of this  
336 quasi-periodic migration highlights the repetitive depolarization and repolarization of cells.  
337 At the poles of the microlanes, cell polarization and hence cell advancement is quenched due

338 to contact with the PEGylated area. Then, spontaneous protrusions of the cell along its  
339 opposite, free edge and subsequent polarization in the opposite direction reverses the cell  
340 motion. The reversal time does neither depend on the length nor on the geometry of the  
341 microlane ends. We find that the experimentally observed pole-to-pole cell migration mode is  
342 recapitulated by an extended Cellular Potts model. Our model shows that the distribution of  
343 stochastic repolarization times might be explained as follows: stochastic membrane  
344 protrusions explore the vicinity of the cell. Then, if the cell can adhere in the explored region,  
345 these protrusions form stable lamellipodia through a self-reinforcing feedback loop. In  
346 addition, the model also captures details of the spatiotemporal evolution of the actin  
347 polymerization front, such as lamellipodium splitting in concave tip geometries. These  
348 findings are surprising, since, the Cellular Potts model does not currently take into account  
349 any molecular details of the cytoskeleton. Further development of the Cellular Potts model to  
350 include myosin and the actin regulating Rho GTPases, which has been the subject of interest  
351 in analytical reaction-diffusion models of moving cells [7, 11-14], will possibly improve  
352 predictions of the morphology and dynamics of the moving cell. In this context, the microlane  
353 assay proves useful as a testbed for future theory, facilitating the accumulation of statistics  
354 over repeated de- and repolarization events. As a cell depolarizes in different microlane  
355 geometries, the resulting spatial distribution of actin activity could lead to a better  
356 understanding of how cell adhesion and the local membrane curvature regulate actin  
357 polymerization [18, 39, 41, 42]. In particular, computational models are challenged to  
358 recapitulate migratory behavior on various micro-pattern geometries in a consistent manner  
359 using an optimized, unique parameter set. Here, future studies combining cell migration  
360 assays on micropatterns and computational models will be valuable for classifying  
361 cytoskeleton dynamics and mechanisms that lead to distinct migration phenotypes in  
362 confinement.

## 363 **Materials and methods**

### 364 **Micropatterning.**

365 Laser lithography. To prepare the master mold of the stamp for micropatterning, a silicon  
366 wafer was coated with TI Prime adhesion promoter and AZ40XT (MicroChemicals)  
367 photoresist. Areas for cell adhesion were exposed to UV light using laser direct imaging  
368 (Protolaser LDI, LPKF). The photoresist was developed (AZ 826 MIF, MicroChemicals) and  
369 then silanized (Trichloro(1H,1H,2H,2H-perfluorooctyl)silane, Sigma-Aldrich). To fabricate  
370 the stamp, polydimethylsiloxane (PDMS) monomer and crosslinker (DC 184 elastomer Kit,

371 Dow Corning) were mixed in a 10:1 ratio (w/w), poured onto the master mold, and cured 3 h  
372 or overnight at 50°C. The crosslinked PDMS layer was peeled off and manually cut into  
373 stamps.

374 Microcontact printing: Stripe-shaped microlanes were produced by microcontact printing.  
375 Firstly, PDMS stamps were exposed with UV-light (PSD-UV, Novascan Technologies) for 5  
376 min. The stamps were then immersed in an aqueous solution of 40 µg/ml fibronectin (Yo  
377 Proteins) containing 10 µg/ml Alexa Fluor 488 dye (Life Technologies) labeled fibronectin  
378 for 45 min. The stamps were subsequently washed with ultrapure water. Stamps were dried  
379 under filtered airflow and then stamped onto a hydrophobic uncoated µ-Dish (Ibidi GmbH)  
380 bottom that underwent UV exposure for 15 min beforehand. The stamps were gently pressed  
381 with tweezers for a few seconds to ensure contact with the bottom. To then fabricate the cell-  
382 repelling areas, 30 µL of 2 mg/ml poly-L-lysine-grafted polyethylene glycol (PLL-g-PEG) (2  
383 kDa PEG chains, SuSoS) dissolved in 10 mM Hepes and 150 mM NaCl solution was added.  
384 After the removal of the stamps, a glass cover slip was placed on the printed bottom to assure  
385 complete coverage with the PEG solution and then incubated for 30 min at room temperature.  
386 Finally, the printed bottom was washed with phosphate buffered saline (1xPBS) three times  
387 and stored in 1x PBS for further cell seeding. Unless otherwise specified, the patterns  
388 consisted of uniform stripes 20 µm in width.

### 389 **Cell culture and transfection.**

390 MDA-MB-231 breast cancer cells were cultured in modified Eagle's medium (MEM-F10,  
391 c.c.pro) supplemented with 10% fetal calf serum (FCS, Invitrogen) and 2.5 mM L-glutamin  
392 (c.c.pro) at 37°C in 5% CO<sub>2</sub> atmosphere. For time-lapse phase-contrast images, cells were  
393 seeded at a density of 1 x 10<sup>4</sup> cells per dish (µ-Dish, IBIDI). After 2 h, cell medium was  
394 replaced by 1 ml Leibovitz's L-15 Medium (c.c.pro) containing 10% FCS and 25 nM Hoechst  
395 33342 nucleic acid stain (Invitrogen) and incubated for 1 h at 37°C before imaging.

396 For actin dynamics studies, seeded cells were further transfected with LifeAct-GFP mRNA.  
397 Briefly, ~1x 10<sup>4</sup> cells were seeded into a 35mm µ-Dish and incubated 2 h at 37°C in 5% CO<sub>2</sub>  
398 for cell adhesion. 1.25 µl Lipofectamine MessengerMax Reagent (Invitrogen) was diluted in  
399 123.75µl OptiMEM (Life Technologies) transfection medium and incubated 10 min at room  
400 temperature. 500 ng mRNA (0.5 µl x 1000 ng/µl) was diluted in 124.5 µl OptiMEM. Both  
401 solution were mixed and incubated for 5 min at room temperature for lipoplex formation.  
402 Adhered cells were washed with 1xPBS, and carefully added to the 250 µl transfection mix.  
403 After a 1 h incubation at 37°C in 5% CO<sub>2</sub>, the cell transfection mix was replaced by 1 ml

404 Leibovitz's L-15 Medium (c.c.pro) containing 10% FCS before proceeding to time lapse  
405 imaging.

#### 406 **Live cell imaging and microscopy.**

407 For migration studies, scanning time lapse measurements were acquired using an automated  
408 inverted microscope iMIC (Till Photonics). The microscope was equipped with a 10x Zeiss  
409 objective and a 40x Zeiss objective, an ORCA-03G camera (HAMAMATSU), and an  
410 Oligochrome lamp (Till Photonics). During the measurements, cells were maintained in L-15  
411 Medium containing 10% FCS at 37°C using a temperature-controlled mounting frame (Ibidi  
412 temperature controller, Ibidi). Phase contrast and fluorescent images were automatically  
413 acquired at 10 min intervals, unless noted otherwise. To analyze the actin dynamics at the  
414 interface of micropatterns, images were acquired at intervals between 20 s - 1 min.

#### 415 **Image processing and data analysis.**

416 Image analysis was carried out using ImageJ (National Institutes of Health, NIH). Images of  
417 isolated cells migrating in the stripe-shaped microlanes were first manually cropped. The  
418 trajectory of each stained nucleus was preprocessed by first applying a bandpass filter and a  
419 threshold to the fluorescence images, and the geometric center of mass of the nucleus was  
420 subsequently evaluated. The geometric mean of the nucleus position was used as a proxy for  
421 the cell position. Only cells that explored the whole stripe were analysed. Cell tracks were  
422 excluded from further analysis in the following cases: cell tracks shorter than 36 h, cell  
423 division or spanning out of the micropattern, and tracks of non-moving or dead cells.

424 Trajectories of individual cells were analyzed in Matlab. Therefore, only the component in  
425 direction of the microlane was considered resulting in a 1D trajectory. The center of the  
426 microlane was determined by taking the middle of the two points where cells got closest to  
427 each tip of the microlane.

#### 428 **Acknowledgements**

429 This work was supported by grants from the Deutsche Forschungsgemeinschaft (DFG) via the  
430 Collaborative Research Center (SFB) 1032 (Project B01 and B02) and the excellence cluster  
431 NanoSystems Initiative Munich (NIM). F.Z. acknowledges support by the China Scholarship  
432 Council (CSC).

433

## References

1. Mitchison TJ, Cramer LP. Actin-Based Cell Motility and Cell Locomotion. *Cell*. 1996;84(3):371-9.
2. Keren K, Pincus Z, Allen GM, Barnhart EL, Marriott G, Mogilner A, et al. Mechanism of shape determination in motile cells. *Nature*. 2008;453(7194):475-80.
3. Kruse K, Camalet S, Julicher F. Self-propagating patterns in active filament bundles. *Phys Rev Lett*. 2001;87(13).
4. Carlsson AE. Dendritic Actin Filament Nucleation Causes Traveling Waves and Patches. *Phys Rev Lett*. 2010;104(22):228102.
5. Giannone G, Dubin-Thaler BJ, Dobereiner HG, Kieffer N, Bresnick AR, Sheetz MP. Periodic lamellipodial contractions correlate with rearward actin waves. *Cell*. 2004;116(3):431-43.
6. Bretschneider T, Anderson K, Ecke M, Müller-Taubenberger A, Schroth-Diez B, Ishikawa-Ankerhold HC, et al. The Three-Dimensional Dynamics of Actin Waves, a Model of Cytoskeletal Self-Organization. *Biophysical Journal*. 2009;96(7):2888-900.
7. Maiuri P, Rupprecht J-F, Wieser S, Ruprecht V, Bénichou O, Carpi N, et al. Actin Flows Mediate a Universal Coupling between Cell Speed and Cell Persistence. *Cell*. 2015;161(2):374-86.
8. Shao D, Levine H, Rappel W-J. Coupling actin flow, adhesion, and morphology in a computational cell motility model. *Proceedings of the National Academy of Sciences*. 2012;109(18):6851-6.
9. Allard J, Mogilner A. Traveling waves in actin dynamics and cell motility. *Current Opinion in Cell Biology*. 2013;25(1):107-15.
10. Verkhovsky AB. The mechanisms of spatial and temporal patterning of cell-edge dynamics. *Curr Opin Cell Biol*. 2015;36:113-21.
11. Mori Y, Jilkine A, Edelstein-Keshet L. Wave-Pinning and Cell Polarity from a Bistable Reaction-Diffusion System. *Biophysical Journal*. 2008;94(9):3684-97.
12. Edelstein-Keshet L, Holmes WR, Zajac M, Dutot M. From simple to detailed models for cell polarization. *Philosophical Transactions of the Royal Society B: Biological Sciences*. 2013;368(1629).
13. Byrne Kate M, Monsefi N, Dawson John C, Degasperis A, Bukowski-Wills J-C, Volinsky N, et al. Bistability in the Rac1, PAK, and RhoA Signaling Network Drives Actin Cytoskeleton Dynamics and Cell Motility Switches. *Cell Systems*. 2016;2(1):38-48.

14. Marée AFM, Grieneisen VA, Edelstein-Keshet L. How Cells Integrate Complex Stimuli: The Effect of Feedback from Phosphoinositides and Cell Shape on Cell Polarization and Motility. *PLOS Computational Biology*. 2012;8(3):e1002402.
15. Falcke M. Concentration profiles of actin-binding molecules in lamellipodia. *Physica D: Nonlinear Phenomena*. 2016;318-319:50-7.
16. Halatek J, Frey E. Rethinking pattern formation in reaction–diffusion systems. *Nature Physics*. 2018;14(5):507-14.
17. Hoeller O, Toettcher JE, Cai H, Sun Y, Huang C-H, Freyre M, et al. G $\beta$  Regulates Coupling between Actin Oscillators for Cell Polarity and Directional Migration. *PLOS Biology*. 2016;14(2):e1002381.
18. Hsu H-F, Bodenschatz E, Westendorf C, Gholami A, Pumir A, Tarantola M, et al. Variability and Order in Cytoskeletal Dynamics of Motile Amoeboid Cells. *Phys Rev Lett*. 2017;119(14):148101.
19. Lautenschläger F, Piel M. Microfabricated devices for cell biology: all for one and one for all. *Current opinion in cell biology*. 2013;25(1):116-24.
20. Maiuri P, Terriac E, Paul-Gilloteaux P, Vignaud T, McNally K, Onuffer J, et al. The first World Cell Race. *Current Biology*. 2012;22(17):R673-R5.
21. Wilson K, Lewalle A, Fritzsche M, Thorogate R, Duke T, Charras G. Mechanisms of leading edge protrusion in interstitial migration. *Nature Communications*. 2013;4:2896.
22. Doyle AD, Wang FW, Matsumoto K, Yamada KM. One-dimensional topography underlies three-dimensional fibrillar cell migration. *The Journal of cell biology*. 2009;184(4):481-90.
23. Picone R, Ren X, Ivanovitch KD, Clarke JDW, McKendry RA, Baum B. A Polarised Population of Dynamic Microtubules Mediates Homeostatic Length Control in Animal Cells. *PLOS Biology*. 2010;8(11):e1000542.
24. Segerer FJ, Thüroff F, Piera Alberola A, Frey E, Rädler JO. Emergence and Persistence of Collective Cell Migration on Small Circular Micropatterns. *Phys Rev Lett*. 2015;114(22):228102.
25. Mahmud G, Campbell CJ, Bishop KJM, Komarova YA, Chaga O, Soh S, et al. Directing cell motions on micropatterned ratchets. *Nature Physics*. 2009;5:606.
26. Caballero D, Voituriez R, Riveline D. The cell ratchet: Interplay between efficient protrusions and adhesion determines cell motion. *Cell Adhesion & Migration*. 2015;9(5):327-34.
27. Caballero D, Comelles J, Piel M, Voituriez R, Riveline D. Ratchetaxis: Long-Range Directed Cell Migration by Local Cues. *Trends in Cell Biology*. 2015;25(12):815-27.



28. Brückner DB, Fink A, Schreiber C, Röttgermann PJF, Rädler JO, Broedersz CP. Publisher Correction: Stochastic nonlinear dynamics of confined cell migration in two-state systems. *Nature Physics*. 2019;15(6):617-.
29. Schreiber C, Segerer FJ, Wagner E, Roidl A, Rädler JO. Ring-Shaped Microlanes and Chemical Barriers as a Platform for Probing Single-Cell Migration. *Scientific Reports*. 2016;6:26858.
30. Zhang J, Guo WH, Wang YL. Microtubules stabilize cell polarity by localizing rear signals. *Proceedings of the National Academy of Sciences of the United States of America*. 2014;111(46):16383-8.
31. Fraley SI, Feng Y, Giri A, Longmore GD, Wirtz D. Dimensional and temporal controls of three-dimensional cell migration by zyxin and binding partners. *Nat Commun*. 2012;3:719.
32. Camley BA, Zhao Y, Li B, Levine H, Rappel W-J. Periodic Migration in a Physical Model of Cells on Micropatterns. *Phys Rev Lett*. 2013;111(15).
33. Mogilner A, Keren K. The Shape of Motile Cells. *Current Biology*. 2009;19(17):R762-R71.
34. Thueroff F, Goychuk A, Reiter M, Frey E. Bridging the gap between single cell migration and collective dynamics. *bioRxiv*. 2019:548677.
35. Daub JT, Merks RMH. A Cell-Based Model of Extracellular-Matrix-Guided Endothelial Cell Migration During Angiogenesis. *Bulletin of Mathematical Biology*. 2013;75(8):1377-99.
36. Kabla AJ. Collective cell migration: leadership, invasion and segregation. *Journal of The Royal Society Interface*. 2012;9(77):3268-78.
37. Merks RMH, Glazier JA. A cell-centered approach to developmental biology. *Physica A: Statistical Mechanics and its Applications*. 2005;352(1):113-30.
38. Segerer FJ, Thüroff F, Alberola AP, Frey E, Rädler JO. Emergence and persistence of collective cell migration on small circular micropatterns. *Phys Rev Lett*. 2015;114(22):228102.
39. James J, Goluch ED, Hu H, Liu C, Mrksich M. Subcellular curvature at the perimeter of micropatterned cells influences lamellipodial distribution and cell polarity. *Cell motility and the cytoskeleton*. 2008;65(11):841-52.
40. Riedl J, Crevenna AH, Kessenbrock K, Yu JH, Neukirchen D, Bista M, et al. Lifeact: a versatile marker to visualize F-actin. *Nature Methods*. 2008;5:605.
41. Jeon H, Koo S, Reese WM, Loskill P, Grigoropoulos CP, Healy KE. Directing cell migration and organization via nanocrater-patterned cell-repellent interfaces. *Nature materials*. 2015;14(9):918.

42. Jiang X, Bruzewicz DA, Wong AP, Piel M, Whitesides GM. Directing cell migration with asymmetric micropatterns. *Proceedings of the National Academy of Sciences*. 2005;102(4):975-8.

## **Supporting information**

**Table S1. Parameters used for the computational simulation in this work.**

**Table S2. Number of analyzed cells for different lengths of microlane with round tips.**

**Table S3. Number of analyzed cells for of microlanes with different geometric tips.**

**Fig. S1 Mean cell velocity as a function of the distance to the nearest tip in microlanes of different lengths.**

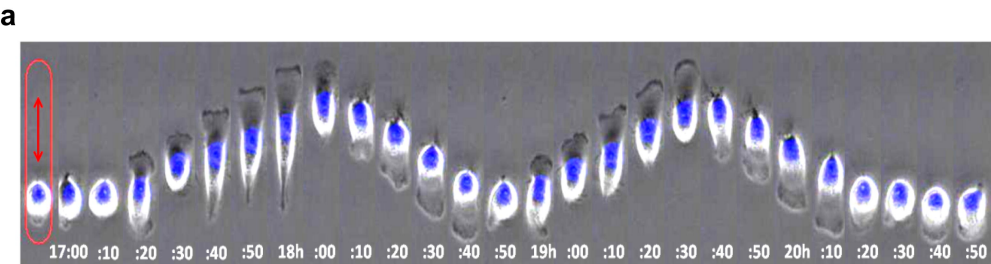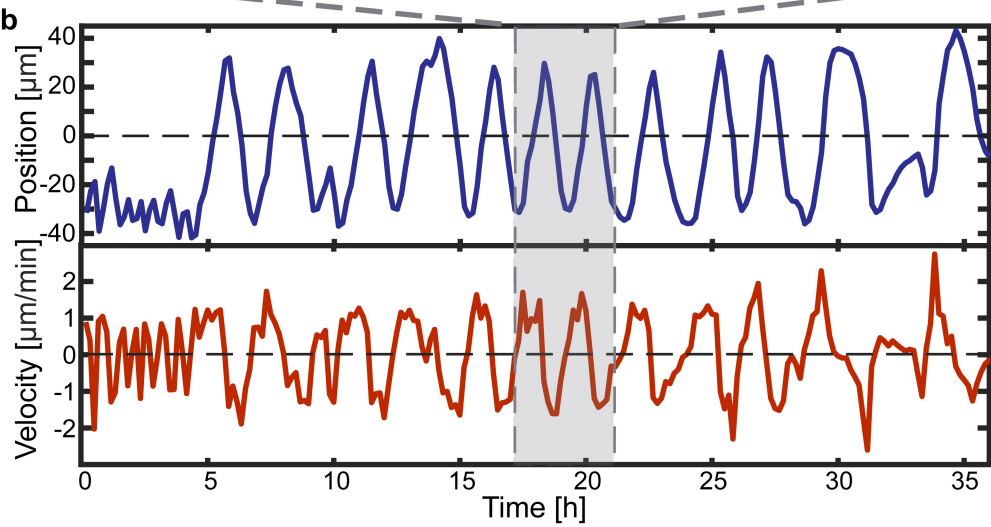

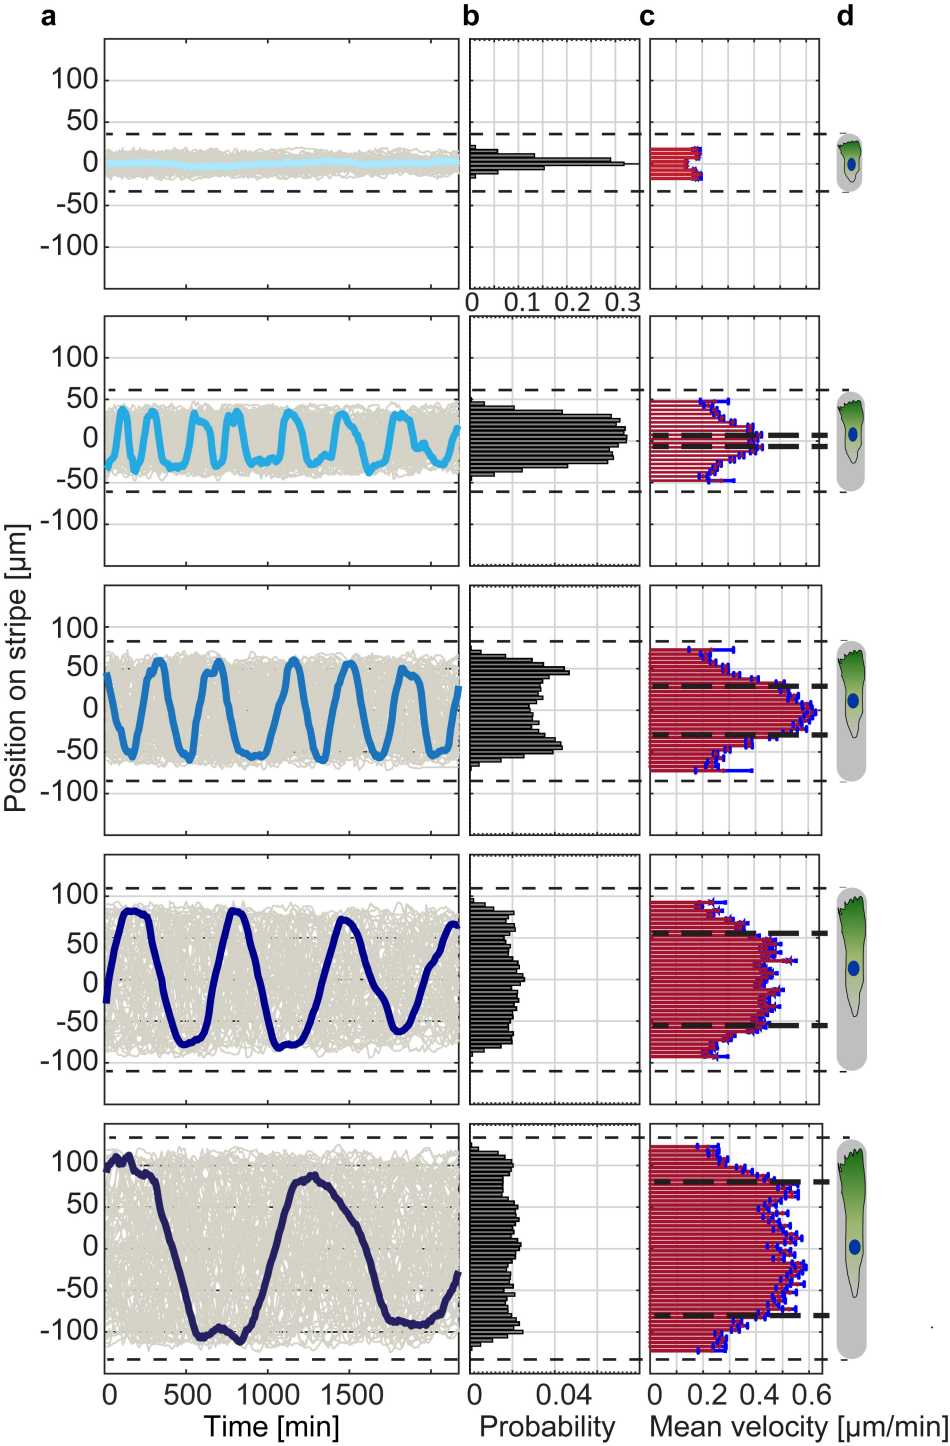

**a**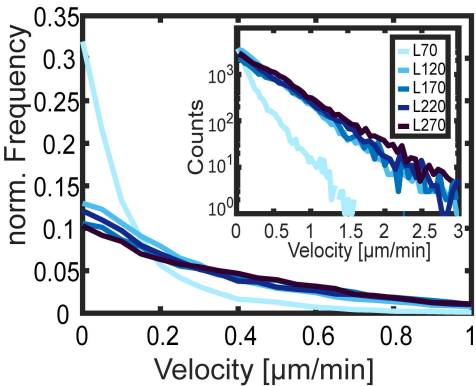**b**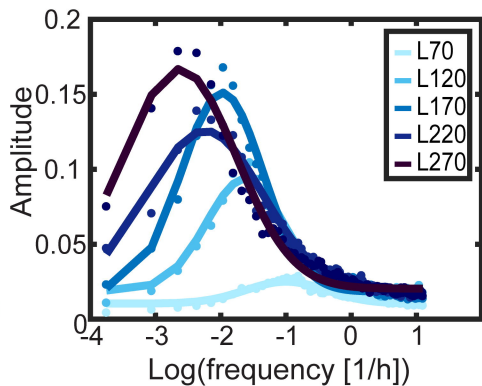**c**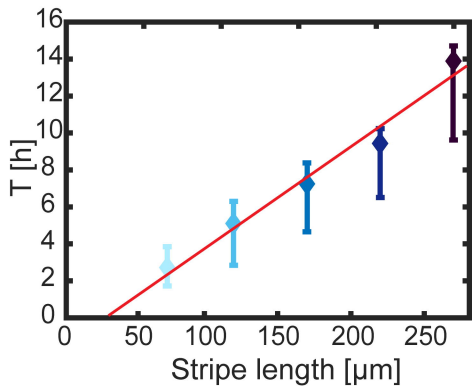

**a**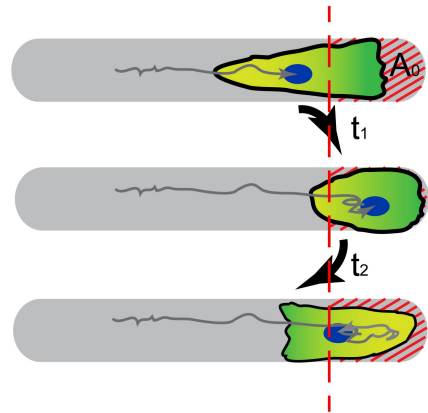**b**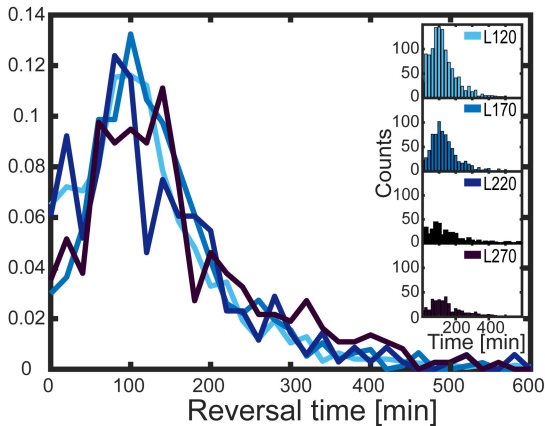

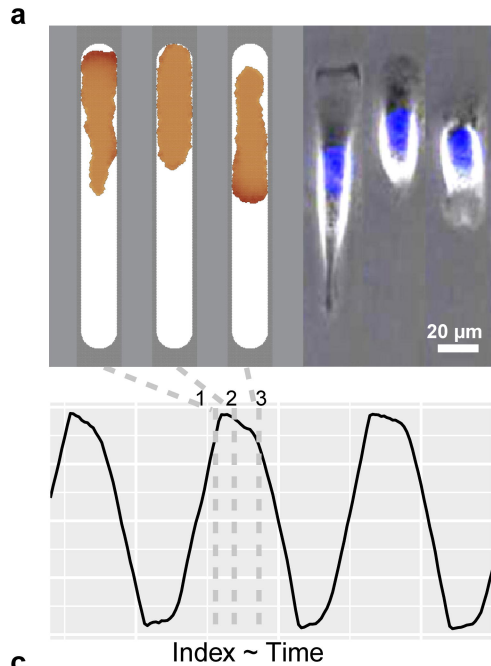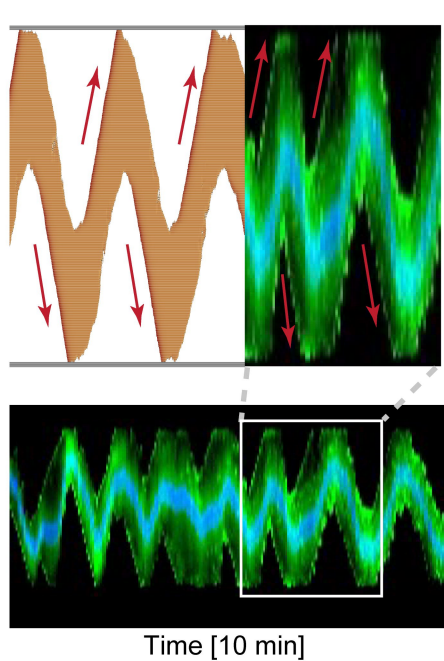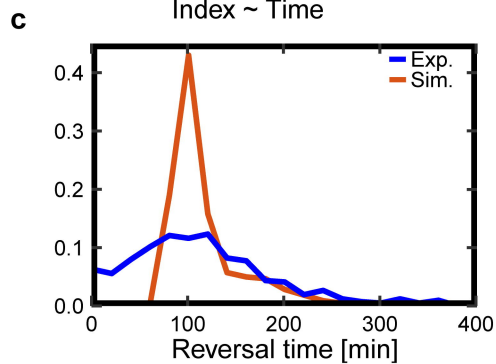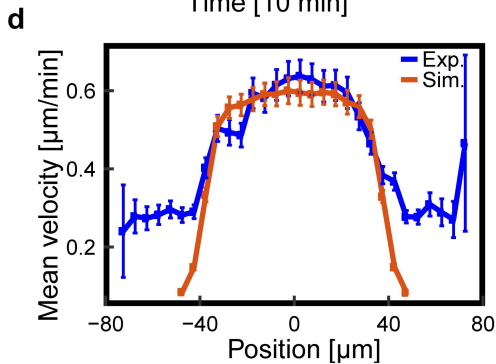



**a**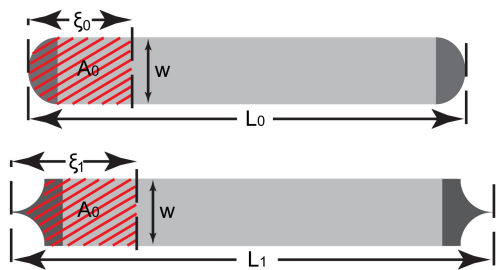**b**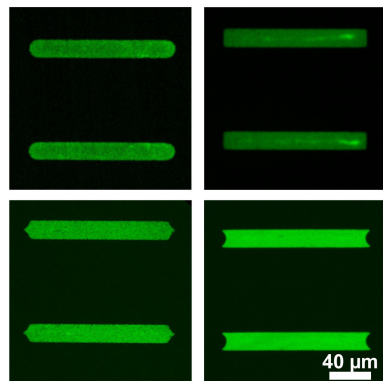**c**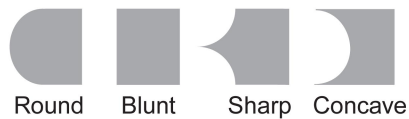**d**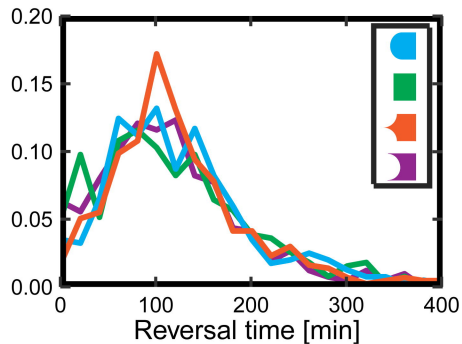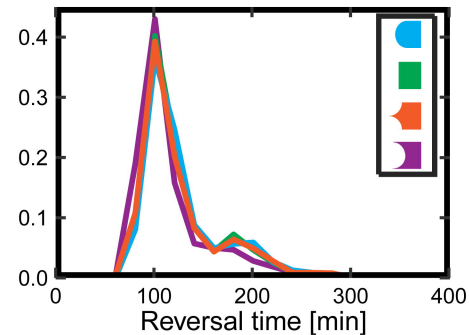

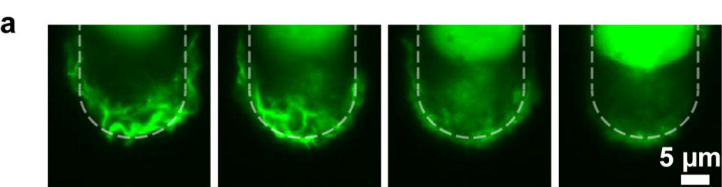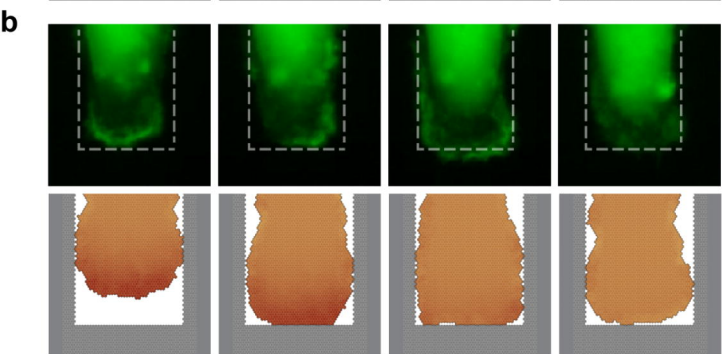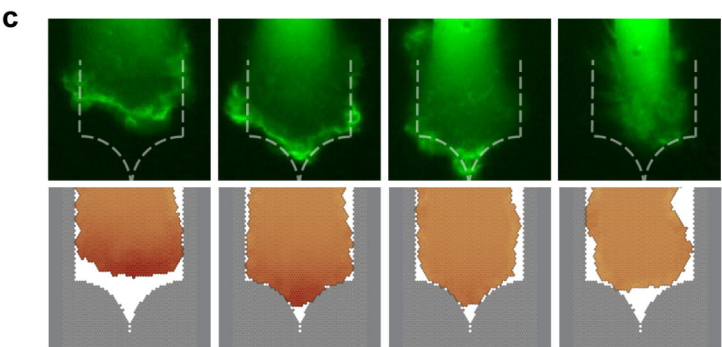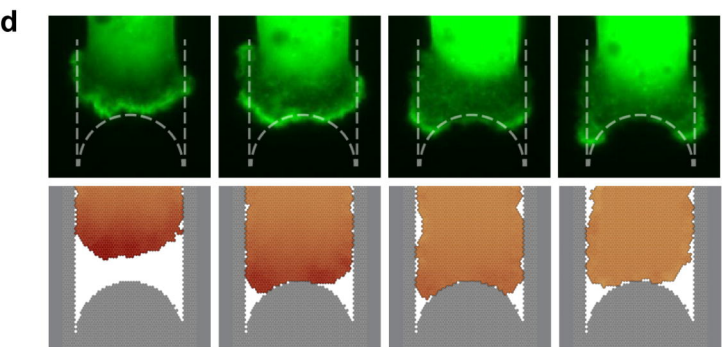

Source: https://www.biorxiv.org/content/10.1101/809939v1.full.pdf
